# Supplementary material
Source: PubMed Central journal article supplement (PMC4164309)
Supplement: NIHMS499705-supplement-2.pdf [file NIHMS499705-supplement-2.pdf]

**Appendix 1:** Genes from literature review included in pathways analysis. A total of 97 unique genes were identified after accounting for duplicates and synonyms.

| Gene Symbol  | Gene Name                                                                      | Source                                                                                                                                                                                                                                                                                                                                                                                                                                                                                                                                                              |
|--------------|--------------------------------------------------------------------------------|---------------------------------------------------------------------------------------------------------------------------------------------------------------------------------------------------------------------------------------------------------------------------------------------------------------------------------------------------------------------------------------------------------------------------------------------------------------------------------------------------------------------------------------------------------------------|
| ACTR3        | ARP3 actin-related protein 3 homolog                                           | Deroee AF, Oweinah J, Naraghi M, et al. Regression of polypoid nasal mucosa after systemic corticosteroid therapy: A proteomics study. <i>Am J Rhinol</i> 2009;23: 480-485.                                                                                                                                                                                                                                                                                                                                                                                         |
| ADRB2        | adrenergic, beta-2-, receptor, surface                                         | Bussu F, Tiziano FD, Giorgio A, et al. Argl6gly polymorphism of the beta2-adrenoceptor gene (ADRBeta2) as a susceptibility factor for nasal polyposis. <i>Am J Rhinol</i> 2007;21:378-82.                                                                                                                                                                                                                                                                                                                                                                           |
| ALDH1A       | aldehyde dehydrogenase 1 family, member A1                                     | Deroee AF, Oweinah J, Naraghi M, et al. Regression of polypoid nasal mucosa after systemic corticosteroid therapy: A proteomics study. <i>Am J Rhinol</i> 2009;23: 480-485.                                                                                                                                                                                                                                                                                                                                                                                         |
| AMFR         | autocrine motility factor receptor                                             | Payne SC, Han JK, Huyett P, et al. Microarray analysis of distinct gene transcription profiles in non-eosinophilic chronic sinusitis with nasal polyps. <i>Am J Rhinol</i> 2008; 22:568-581.                                                                                                                                                                                                                                                                                                                                                                        |
| AREG         | amphiregulin                                                                   | Li CW, Cheung W, Lin ZB, Lim JT, Wang DY. Oral steroids enhance repair in nasal polyposis via upregulation of the AP-1 gene network. <i>Thorax</i> 2009; 64:306-312.                                                                                                                                                                                                                                                                                                                                                                                                |
| AZGP1        | alpha-2-glycoprotein 1, zinc-binding                                           | Stankovic KM, Goldsztejn H, Reh DD, Platt MP, Metson R. Gene Expression Profiling of Nasal Polyps Associated With Chronic Sinusitis and Aspirin-Sensitive Asthma. <i>Laryngoscope</i> 2008;118:881-889.                                                                                                                                                                                                                                                                                                                                                             |
| Beta adaptin | Beta adaptin                                                                   | Zander KA, Saavedra MT, West J, et al. Protein microarray analysis of nasal polyps from aspirin-sensitive and aspirin-tolerant patients with chronic rhinosinusitis. <i>Am J Rhinol</i> 2009; 23:268-72.                                                                                                                                                                                                                                                                                                                                                            |
| CAMP         | cathelicidin antimicrobial peptide                                             | Chen PH, Fang SY. The expression of human antimicrobial peptide LL-37 in the human nasal mucosa <i>Am J Rhinol</i> 2004; 18:381-5.                                                                                                                                                                                                                                                                                                                                                                                                                                  |
| CCL5         | chemokine (C-C motif) ligand 5                                                 | Bartels J, Maune S, Meyer JE, et al. Increased eotaxin-mRNA expression in non-atopic and atopic nasal polyps: comparison to RANTES and MCP-3 expression. <i>Rhinology</i> 1997; 35:171-4.                                                                                                                                                                                                                                                                                                                                                                           |
| CCL11        | chemokine (C-C motif) ligand 11                                                |                                                                                                                                                                                                                                                                                                                                                                                                                                                                                                                                                                     |
| CCL24        | chemokine (C-C motif) ligand 24                                                | Schaefer D, Meyer JE, Pods R. Endothelial and epithelial expression of eotaxin-2 (CCL24) in nasal polyps. <i>Int Arch Allergy Immunol</i> 2006; 140:205-14.                                                                                                                                                                                                                                                                                                                                                                                                         |
| CCR2         | chemokine (C-C motif) receptor 2                                               | Bolger WE, Joshi AS, Spear S, Nelson M, Govindaraj K. Gene expression analysis in sinonasal polyposis before and after oral corticosteroids: A preliminary investigation. <i>Otolaryngol Head Neck Surg</i> 2007;137: 27-33.                                                                                                                                                                                                                                                                                                                                        |
| CCR5         | chemokine (C-C motif) receptor 5                                               |                                                                                                                                                                                                                                                                                                                                                                                                                                                                                                                                                                     |
| CTSB         | cathepsin B                                                                    | Orlandi RR, Thibeault SL, Ferguson BJ. Microarray analysis of allergic fungal sinusitis and eosinophilic mucin rhinosinusitis. <i>Otolaryngol Head Neck Surg</i> 2007;136, 707-713.                                                                                                                                                                                                                                                                                                                                                                                 |
| CX3CL1       | chemokine (C-X3-C motif) ligand 1                                              | Bolger WE, Joshi AS, Spear S, Nelson M, Govindaraj K. Gene expression analysis in sinonasal polyposis before and after oral corticosteroids: A preliminary investigation. <i>Otolaryngol Head Neck Surg</i> 2007;137: 27-33.                                                                                                                                                                                                                                                                                                                                        |
| CXCL1        | chemokine (C-X-C motif) ligand 1 (melanoma growth stimulating activity, alpha) | Payne SC, Han JK, Huyett P, et al. Microarray analysis of distinct gene transcription profiles in non-eosinophilic chronic sinusitis with nasal polyps. <i>Am J Rhinol</i> 2008; 22:568-581.                                                                                                                                                                                                                                                                                                                                                                        |
| CYSLTR1      | cysteinyl leukotriene receptor 1                                               | Perez-Novo CA, Claeys C, Van Cauwenberge P, Bachert C. Expression of eicosanoid receptors subtypes and eosinophilic inflammation: implication on chronic rhinosinusitis. <i>Respir Res</i> 2006; 7:75.                                                                                                                                                                                                                                                                                                                                                              |
| CYSLTR2      | cysteinyl leukotriene receptor 2                                               |                                                                                                                                                                                                                                                                                                                                                                                                                                                                                                                                                                     |
| DMBT1        | deleted in malignant brain tumors 1                                            | Liu Z, Kim J, Sypek JP, et al. Gene expression profiles in human nasal polyp tissues studied by means of DNA microarray. <i>J Allergy Clin Immunol</i> 2004;114:783-90.<br>Al Badaai Y, DiFalco MR, Tewfik MA, Samaha M. Quantitative proteomics of nasal mucus in chronic sinusitis with nasal polyposis. <i>J Otolaryngol Head Neck Surg</i> 2009;38:381-9.<br>Kim TH, Lee SH, Lee HM, et al. Increased expression of glycoprotein 340 in the ethmoid sinus mucosa of patients with chronic sinusitis. <i>Arch Otolaryngol Head Neck Surg</i> 2007;133:1111-1114. |
| EGFR         | epidermal growth factor receptor                                               | Ding GQ, Zheng CQ, Bagga SS. Up-regulation of the mucosal epidermal growth factor receptor gene in chronic rhinosinusitis and nasal polyposis. <i>Arch Otolaryngol Head Neck Surg</i> 2007;133:1097-1103.                                                                                                                                                                                                                                                                                                                                                           |
| EGR1         | early growth response 1                                                        | Li CW, Cheung W, Lin ZB, Lim JT, Wang DY. Oral steroids enhance repair in nasal polyposis via upregulation of the AP-1 gene network. <i>Thorax</i> 2009; 64:306-312.                                                                                                                                                                                                                                                                                                                                                                                                |
| EIF2S1       | eukaryotic translation initiation factor 2, subunit 1 alpha, 35kDa             | Deroee AF, Oweinah J, Naraghi M, et al. Regression of polypoid nasal mucosa after systemic corticosteroid therapy: A proteomics study. <i>Am J Rhinol</i> 2009;23: 480-485.                                                                                                                                                                                                                                                                                                                                                                                         |
| FGF7         | fibroblast growth factor 7 (keratinocyte growth                                | Ishibashi T, Tanaka T, Nibu K, Ishimoto S, Kaga K. Keratinocyte growth factor and its receptor messenger RNA expression in nasal mucosa and nasal polyps. <i>Ann Otol Rhinol Laryngol</i> 1998; 107:885-90.                                                                                                                                                                                                                                                                                                                                                         |

|                |                                                                                         |                                                                                                                                                                                                                                                                                                                                                                                                                                                                                                                                                                                                                                                                                                                                                                |
|----------------|-----------------------------------------------------------------------------------------|----------------------------------------------------------------------------------------------------------------------------------------------------------------------------------------------------------------------------------------------------------------------------------------------------------------------------------------------------------------------------------------------------------------------------------------------------------------------------------------------------------------------------------------------------------------------------------------------------------------------------------------------------------------------------------------------------------------------------------------------------------------|
|                | factor)                                                                                 |                                                                                                                                                                                                                                                                                                                                                                                                                                                                                                                                                                                                                                                                                                                                                                |
| FOXP3          | forkhead box P3                                                                         | Van Bruaene N, Perez-Novo CA, Basinski TM, et al. T-cell regulation in chronic paranasal sinus disease. <i>J Allergy Clin Immunol</i> 2008;121:1435-41.                                                                                                                                                                                                                                                                                                                                                                                                                                                                                                                                                                                                        |
| GATA3          | GATA binding protein 3                                                                  |                                                                                                                                                                                                                                                                                                                                                                                                                                                                                                                                                                                                                                                                                                                                                                |
| GM2A           | GM2 ganglioside activator                                                               | Orlandi RR, Thibeault SL, Ferguson BJ. Microarray analysis of allergic fungal sinusitis and eosinophilic mucin rhinosinusitis. <i>Otolaryngol Head Neck Surg</i> 2007;136, 707-713.                                                                                                                                                                                                                                                                                                                                                                                                                                                                                                                                                                            |
| GPR44          | G protein-coupled receptor 44                                                           | Yamamoto M, Okano M, Fujiwara T, et al. Expression and characterization of PGD2 receptors in chronic rhinosinusitis: modulation of DP and CRTH2 by PGD2. <i>Int Arch Allergy Immunol</i> 2009; 148:127-36.                                                                                                                                                                                                                                                                                                                                                                                                                                                                                                                                                     |
| HBEGF          | heparin-binding EGF-like growth factor                                                  | Li CW, Cheung W, Lin ZB, Lim JT, Wang DY. Oral steroids enhance repair in nasal polyposis via upregulation of the AP-1 gene network. <i>Thorax</i> 2009; 64:306-312.                                                                                                                                                                                                                                                                                                                                                                                                                                                                                                                                                                                           |
| HGF            | hepatocyte growth factor (hepapoietin A; scatter factor)                                | Rho HS, Lee SH, Lee HM. Overexpression of hepatocyte growth factor and its receptor c-Met in nasal polyps. <i>Arch Otolaryngol Head Neck Surg</i> 2006;132:985-989.                                                                                                                                                                                                                                                                                                                                                                                                                                                                                                                                                                                            |
| HIF1A          | hypoxia inducible factor 1, alpha subunit (basic helix-loop-helix transcription factor) | Payne SC, Han JK, Huyett P, et al. Microarray analysis of distinct gene transcription profiles in non-eosinophilic chronic sinusitis with nasal polyps. <i>Am J Rhinol</i> 2008; 22:568-581.                                                                                                                                                                                                                                                                                                                                                                                                                                                                                                                                                                   |
| HLA-DQB1       | major histocompatibility complex, class II, DQ beta 1                                   | Schubert MS, Hutcheson PS, Graff RJ, Santiago L, Slavin RG. HLA-DQB1*03 in allergic fungal sinusitis and other chronic hypertrophic rhinosinusitis. <i>J Allergy Clin Immunol</i> 2004;114:1376-83.                                                                                                                                                                                                                                                                                                                                                                                                                                                                                                                                                            |
| HPSE           | heparanase                                                                              | Kim TH, Lee HM, Lee SH, et al. Up-regulation of heparanase in the ethmoid sinus mucosa of patients with chronic sinusitis. <i>Am J Rhinol Allergy</i> 2009; 23:130-4.                                                                                                                                                                                                                                                                                                                                                                                                                                                                                                                                                                                          |
| HSPA5          | heat shock 70kDa protein 5 (glucose-regulated protein, 78kDa)                           | Deroee AF, Oweinah J, Naraghi M, et al. Regression of polypoid nasal mucosa after systemic corticosteroid therapy: A proteomics study. <i>Am J Rhinol</i> 2009;23: 480-485.                                                                                                                                                                                                                                                                                                                                                                                                                                                                                                                                                                                    |
| HSPA1A         | heat shock 70kDa protein 1A                                                             | Zander KA, Saavedra MT, West J, et al. Protein microarray analysis of nasal polyps from aspirin-sensitive and aspirin-tolerant patients with chronic rhinosinusitis. <i>Am J Rhinol Allergy</i> 2009; 23:268-72.                                                                                                                                                                                                                                                                                                                                                                                                                                                                                                                                               |
| IDO1           | indoleamine 2,3-dioxygenase 1                                                           | Sekigawa T, Tajjima A, Hasegawa T, et al. Gene-expression profiles in human nasal polyp tissues and identification of genetic susceptibility in aspirin-intolerant asthma. <i>Clin Exp Allergy</i> 2009;39:972-81.                                                                                                                                                                                                                                                                                                                                                                                                                                                                                                                                             |
| IGKC           | immunoglobulin kappa constant                                                           | Deroee AF, Oweinah J, Naraghi M, et al. Regression of polypoid nasal mucosa after systemic corticosteroid therapy: A proteomics study. <i>Am J Rhinol</i> 2009;23: 480-485.                                                                                                                                                                                                                                                                                                                                                                                                                                                                                                                                                                                    |
| IGLV4-3        | immunoglobulin lambda variable 4-3                                                      | Al Badaai Y, DiFalco MR, Tewfik MA, Samaha M. Quantitative proteomics of nasal mucus in chronic sinusitis with nasal polyposis. <i>J Otolaryngol Head Neck Surg</i> 2009;38:381-9.                                                                                                                                                                                                                                                                                                                                                                                                                                                                                                                                                                             |
| IL5            | interleukin 5 (colony-stimulating factor, eosinophil)                                   | Figueiredo CR, Santos RP, Silva I, Weckx L. Microarray cDNA to identify inflammatory genes in nasal polyposis. <i>Am J Rhinol</i> 2007; 21:231-235.<br>Van Bruaene N, Perez-Novo CA, Basinski TM, et al. T-cell regulation in chronic paranasal sinus disease. <i>J Allergy Clin Immunol</i> 2008;121:1435-41. <sup>12</sup> Chen YS, Langhammer T, Westhofen M, Lorenzen J. Relationship between matrix metalloproteinases MMP-2, MMP-9, tissue inhibitor of matrix metalloproteinases-1 and IL-5, IL-8 in nasal polyps. <i>Allergy</i> 2007; 62: 66-72.<br>Chen YS, Arab SF, Westhofen M, Lorenzen J. Expression of interleukin-5, interleukin-8, and interleukin-10 mRNA in the osteomeatal complex in nasal polyposis. <i>Am J Rhinol</i> 2005; 19:117-23. |
| IL6            | interleukin 6 (interferon, beta 2)                                                      | Anand VK, Kacker A, Orjuela AF, et al. Inflammatory pathway gene expression in chronic rhinosinusitis. <i>Am J Rhinol</i> 2006; 20:471-6.<br>Payne SC, Han JK, Huyett P, et al. Microarray analysis of distinct gene transcription profiles in non-eosinophilic chronic sinusitis with nasal polyps. <i>Am J Rhinol</i> 2008; 22:568-581.<br>Li CW, Cheung W, Lin ZB, Lim JT, Wang DY. Oral steroids enhance repair in nasal polyposis via upregulation of the AP-1 gene network. <i>Thorax</i> 2009; 64:306-312.                                                                                                                                                                                                                                              |
| IL8            | interleukin 8                                                                           | Payne SC, Han JK, Huyett P, et al. Microarray analysis of distinct gene transcription profiles in non-eosinophilic chronic sinusitis with nasal polyps. <i>Am J Rhinol</i> 2008; 22:568-581.<br>Liu B, Wu J, Fan J, Peng Y. Gene expression profiles in human nasal polyps studies by DNA microarray. <i>Lin Chung Er Bi Yan Hou Tou Jing Wai Ke Za Zhi</i> . 2008;22(11):495-7.                                                                                                                                                                                                                                                                                                                                                                               |
| IL13           | interleukin 13                                                                          | Anand VK, Kacker A, Orjuela AF, et al. Inflammatory pathway gene expression in chronic rhinosinusitis. <i>Am J Rhinol</i> 2006; 20:471-6.<br>Van Bruaene N, Perez-Novo CA, Basinski TM, et al. T-cell regulation in chronic paranasal sinus disease. <i>J Allergy Clin Immunol</i> 2008;121:1435-41.                                                                                                                                                                                                                                                                                                                                                                                                                                                           |
| IL16           | interleukin 16 (lymphocyte chemoattractant factor)                                      | Lackner A, Raggam RB, Stammberger H, et al. The role of interleukin-16 in eosinophilic chronic rhinosinusitis. <i>Eur Arch Otorhinolaryngol</i> 2007; 264:887-93.                                                                                                                                                                                                                                                                                                                                                                                                                                                                                                                                                                                              |
| IL12 (complex) | interleukin 12                                                                          | Anand VK, Kacker A, Orjuela AF, et al. Inflammatory pathway gene expression in chronic rhinosinusitis. <i>Am J Rhinol</i> 2006; 20:471-6.                                                                                                                                                                                                                                                                                                                                                                                                                                                                                                                                                                                                                      |
| IL17A          | interleukin 17A                                                                         | Wang X, Dong Z, Zhu DD, Guan B. Expression profile of immune-associated genes in nasal polyps. <i>Ann Otol Rhinol Laryngol</i> 2006;115:450-6.                                                                                                                                                                                                                                                                                                                                                                                                                                                                                                                                                                                                                 |
| IL17RA         | interleukin 17                                                                          |                                                                                                                                                                                                                                                                                                                                                                                                                                                                                                                                                                                                                                                                                                                                                                |

|         |                                                                                        |                                                                                                                                                                                                                                                                                                                                                                                                                                                                                                                                                                                   |
|---------|----------------------------------------------------------------------------------------|-----------------------------------------------------------------------------------------------------------------------------------------------------------------------------------------------------------------------------------------------------------------------------------------------------------------------------------------------------------------------------------------------------------------------------------------------------------------------------------------------------------------------------------------------------------------------------------|
|         | receptor A                                                                             |                                                                                                                                                                                                                                                                                                                                                                                                                                                                                                                                                                                   |
| IL1R2   | interleukin 1 receptor, type II                                                        | Sekigawa T, Tajjima A, Hasegawa T, et al. Gene-expression profiles in human nasal polyp tissues and identification of genetic susceptibility in aspirin-intolerant asthma. <i>Clin Exp Allergy</i> 2009;39:972-81.                                                                                                                                                                                                                                                                                                                                                                |
| IL1RL1  | Interleukin 1 receptor -like 1                                                         | Castano R, Bosse Y, Endam LM, Desrosiers M. Evidence of association of interleukin-1 receptor-like 1 gene polymorphisms with chronic rhinosinusitis. <i>Am J Rhinol Allergy</i> 2009;23:377-84.                                                                                                                                                                                                                                                                                                                                                                                   |
| IL1RN   | interleukin 1 receptor antagonist                                                      | Cheng Y, Lin C, Chang W. Increased prevalence of interleukin-1 receptor antagonist gene polymorphism in patients with chronic rhinosinusitis. <i>Arch Otolaryngol Head Neck Surg</i> 2006;132:285-290.                                                                                                                                                                                                                                                                                                                                                                            |
| IL22RA1 | interleukin 22 receptor, alpha 1                                                       | Ramanathan M, Spannhake EW, Lane AP. Chronic rhinosinusitis with nasal polyps is associated with decreased expression of mucosal interleukin 22 receptor. <i>Laryngoscope</i> 2007; 117:1839–1843. Endam LM, Bosse Y, Filali-Mouhim A, et al. Polymorphisms in the interleukin-22 receptor alpha-1 gene are associated with severe chronic rhinosinusitis. <i>Otolaryngol Head Neck Surg</i> 2009; 140:741-7.                                                                                                                                                                     |
| IQGAP1  | IQ motif containing GTPase activating protein 1                                        | Deroee AF, Oweinah J, Naraghi M, et al. Regression of polypoid nasal mucosa after systemic corticosteroid therapy: A proteomics study. <i>Am J Rhinol</i> 2009;23: 480-485.                                                                                                                                                                                                                                                                                                                                                                                                       |
| JUN     | jun oncogene                                                                           | Li CW, Cheung W, Lin ZB, Lim JT, Wang DY. Oral steroids enhance repair in nasal polyposis via upregulation of the AP-1 gene network. <i>Thorax</i> 2009; 64:306-312.                                                                                                                                                                                                                                                                                                                                                                                                              |
| LCN1    | lipocalin 1 (tear prealbumin)                                                          | Al Badaai Y, DiFalco MR, Tewfik MA, Samaha M. Quantitative proteomics of nasal mucus in chronic sinusitis with nasal polyposis. <i>J Otolaryngol Head Neck Surg</i> 2009;38:381-9.                                                                                                                                                                                                                                                                                                                                                                                                |
| LTB4R   | leukotriene B4 receptor                                                                | Bolger WE, Joshi AS, Spear S, Nelson M, Govindaraj K. Gene expression analysis in sinonasal polyposis before and after oral corticosteroids: A preliminary investigation. <i>Otolaryngol Head Neck Surg</i> 2007;137: 27-33.                                                                                                                                                                                                                                                                                                                                                      |
| LTC4S   | leukotriene C4 synthase                                                                | de Alarcon A, Steinke JW, Caughey R, et al. Expression of leukotriene C4 synthase and plasminogen activator inhibitor 1 gene promoter polymorphisms in sinusitis. <i>Am J Rhinol</i> 2006; 20:545-9.                                                                                                                                                                                                                                                                                                                                                                              |
| LTF     | lactotransferrin                                                                       | Liu Z, Kim J, Sypek JP, et al. Gene expression profiles in human nasal polyp tissues studied by means of DNA microarray. <i>J Allergy Clin Immunol</i> 2004;114:783-90.                                                                                                                                                                                                                                                                                                                                                                                                           |
| LYZ     | lysozyme                                                                               | Tewfik MA, Latterich M, DiFalco MR, Samaha M. Proteomics of nasal mucus in chronic rhinosinusitis. <i>Am J Rhinol</i> 2007; 21:680-5, Al Badaai Y, DiFalco MR, Tewfik MA, Samaha M. Quantitative proteomics of nasal mucus in chronic sinusitis with nasal polyposis. <i>J Otolaryngol Head Neck Surg</i> 2009;38:381-9.                                                                                                                                                                                                                                                          |
| MCPT1   | mast cell protease 1                                                                   | Payne SC, Han JK, Huyett P, et al. Microarray analysis of distinct gene transcription profiles in non-eosinophilic chronic sinusitis with nasal polyps. <i>Am J Rhinol</i> 2008; 22:568–581.                                                                                                                                                                                                                                                                                                                                                                                      |
| MET     | met proto-oncogene (hepatocyte growth factor receptor)                                 | Stankovic KM, Goldsztein H, Reh DD, Platt MP, Metson R. Gene Expression Profiling of Nasal Polyps Associated With Chronic Sinusitis and Aspirin-Sensitive Asthma. <i>Laryngoscope</i> 2008;118:881–889. Castano R, Bosse Y, Endam LM, Filali-Mouhim A, Desrosiers M. c-MET pathway involvement in chronic rhinosinusitis: a genetic association analysis. <i>Otolaryngol Head Neck Surg</i> 2010; 142:665-71. Rho HS, Lee SH, Lee HM. Overexpression of hepatocyte growth factor and its receptor c-Met in nasal polyps. <i>Arch Otolaryngol Head Neck Surg</i> 2006;132:985-989. |
| MMP9    | matrix metalloproteinase 9 (gelatinase B, 92kDa gelatinase, 92kDa type IV collagenase) | Chen YS, Langhammer T, Westhofen M, Lorenzen J. Relationship between matrix metalloproteinases MMP-2, MMP-9, tissue inhibitor of matrix metalloproteinases-1 and IL-5, IL-8 in nasal polyps. <i>Allergy</i> 2007; 62: 66–72.                                                                                                                                                                                                                                                                                                                                                      |
| MUC8    | mucin 8                                                                                | Kim SS, Kim KS, Lee JG, et al. Levels of intracellular protein and messenger RNA of mucin and lysozyme in normal human nasal and polyp epithelium. <i>Laryngoscope</i> 2000; 110:276-80.                                                                                                                                                                                                                                                                                                                                                                                          |
| P4HB    | prolyl 4-hydroxylase, beta polypeptide                                                 | Deroee AF, Oweinah J, Naraghi M, et al. Regression of polypoid nasal mucosa after systemic corticosteroid therapy: A proteomics study. <i>Am J Rhinol</i> 2009;23: 480-485.                                                                                                                                                                                                                                                                                                                                                                                                       |
| PARK7   | Parkinson disease (autosomal recessive, early onset) 7                                 |                                                                                                                                                                                                                                                                                                                                                                                                                                                                                                                                                                                   |
| PIP     | prolactin-induced protein                                                              | Stankovic KM, Goldsztein H, Reh DD, Platt MP, Metson R. Gene Expression Profiling of Nasal Polyps Associated With Chronic Sinusitis and Aspirin-Sensitive Asthma. <i>Laryngoscope</i> 2008;118:881–889. Liu Z, Kim J, Sypek JP, et al. Gene expression profiles in human nasal polyp tissues studied by means of DNA microarray. <i>J Allergy Clin Immunol</i> 2004;114:783-90.                                                                                                                                                                                                   |
| POSTN   | periostin, osteoblast specific factor                                                  | Stankovic KM, Goldsztein H, Reh DD, Platt MP, Metson R. Gene Expression Profiling of Nasal Polyps Associated With Chronic Sinusitis and Aspirin-Sensitive Asthma. <i>Laryngoscope</i> 2008;118:881–889.                                                                                                                                                                                                                                                                                                                                                                           |
| PPP1R9B | protein phosphatase 1, regulatory (inhibitor) subunit 9B                               |                                                                                                                                                                                                                                                                                                                                                                                                                                                                                                                                                                                   |
| PTGDR   | prostaglandin D2 receptor (DP)                                                         | Yamamoto M, Okano M, Fujiwara T, et al. Expression and characterization of PGD2 receptors in chronic rhinosinusitis: modulation of DP and CRTH2 by PGD2. <i>Int Arch Allergy Immunol</i> 2009; 148:127-36.                                                                                                                                                                                                                                                                                                                                                                        |
| PTGDS   | prostaglandin D2 synthase 21kDa (brain)                                                | Okano M, Fujiwara T, Yamamoto M, et al. Role of prostaglandin D2 and E2 terminal synthases in chronic rhinosinusitis. <i>Clin Exp Allergy</i> 2006; 36:1028-38.                                                                                                                                                                                                                                                                                                                                                                                                                   |
| PTGER1  | prostaglandin E receptor 1 (subtype)                                                   | Perez-Novo CA, Watelet JB, Claeys C, Van Cauwenberge P, Bachert C. Prostaglandin, leukotriene, and lipoxin balance in chronic rhinosinusitis with and without nasal polyposis. <i>J Allergy Clin Immunol</i>                                                                                                                                                                                                                                                                                                                                                                      |

|          |                                                                                       |                                                                                                                                                                                                                                                                                                                                                                                                                                                                                                                                                                                                                                                                                                                                        |
|----------|---------------------------------------------------------------------------------------|----------------------------------------------------------------------------------------------------------------------------------------------------------------------------------------------------------------------------------------------------------------------------------------------------------------------------------------------------------------------------------------------------------------------------------------------------------------------------------------------------------------------------------------------------------------------------------------------------------------------------------------------------------------------------------------------------------------------------------------|
|          | EP1), 42kDa                                                                           | 2005;115:1189-96.                                                                                                                                                                                                                                                                                                                                                                                                                                                                                                                                                                                                                                                                                                                      |
| PTGER2   | prostaglandin E receptor 2 (subtype EP2), 53kDa                                       |                                                                                                                                                                                                                                                                                                                                                                                                                                                                                                                                                                                                                                                                                                                                        |
| PTGER3   | prostaglandin E receptor 3 (subtype EP3)                                              |                                                                                                                                                                                                                                                                                                                                                                                                                                                                                                                                                                                                                                                                                                                                        |
| PTGER4   | prostaglandin E receptor 4 (subtype EP4)                                              |                                                                                                                                                                                                                                                                                                                                                                                                                                                                                                                                                                                                                                                                                                                                        |
| PTGES    | prostaglandin E synthase                                                              | Okano M, Fujiwara T, Yammamoto M, et al. Role of prostaglandin D2 and E2 terminal synthases in chronic rhinosinusitis. <i>Clin Exp Allergy</i> 2006; 36:1028-38.                                                                                                                                                                                                                                                                                                                                                                                                                                                                                                                                                                       |
| PTGES2   | prostaglandin E synthase 2                                                            | Perez-Novo CA, Watelet JB, Claeys C, Van Cauwenberge P, Bachert C. Prostaglandin, leukotriene, and lipoxin balance in chronic rhinosinusitis with and without nasal polyposis. <i>J Allergy Clin Immunol</i> 2005;115:1189-96.                                                                                                                                                                                                                                                                                                                                                                                                                                                                                                         |
| PTGS2    | prostaglandin-endoperoxide synthase 2 (prostaglandin G/H synthase and cyclooxygenase) |                                                                                                                                                                                                                                                                                                                                                                                                                                                                                                                                                                                                                                                                                                                                        |
| RGS1     | regulator of G-protein signaling 1                                                    | Liu B, Wu J, Fan J, Peng Y. Gene expression profiles in human nasal polyps studies by DNA microarray. <i>Lin Chung Er Bi Yan Hou Tou Jing Wai Ke Za Zhi</i> . 2008;22(11):495-7.                                                                                                                                                                                                                                                                                                                                                                                                                                                                                                                                                       |
| S100     | S100                                                                                  | Orlandi RR, Thibeault SL, Ferguson BJ. Microarray analysis of allergic fungal sinusitis and eosinophilic mucin rhinosinusitis. <i>Otolaryngol Head Neck Surg</i> 2007;136, 707-713.<br>Al Badaai Y, DiFalco MR, Tewfik MA, Samaha M. Quantitative proteomics of nasal mucus in chronic sinusitis with nasal polyposis. <i>J Otolaryngol Head Neck Surg</i> 2009;38:381-9.                                                                                                                                                                                                                                                                                                                                                              |
| S100A7   | S100 calcium binding protein A7                                                       | Richer SL, Truong-Tran AQ, Conley DB, et al. Epithelial genes in chronic rhinosinusitis with and without nasal polyps. <i>Am J Rhinol</i> 2008; 22:228-34.                                                                                                                                                                                                                                                                                                                                                                                                                                                                                                                                                                             |
| S100A8   | S100 calcium binding protein A8                                                       |                                                                                                                                                                                                                                                                                                                                                                                                                                                                                                                                                                                                                                                                                                                                        |
| SCGB1A1  | secretoglobin, family 1A, member 1 (uteroglobin)                                      | Benson M, Carlsson L, Adner M, et al. Gene profiling reveals increased expression of uteroglobin and other anti-inflammatory genes in glucocorticoid-treated nasal polyps. <i>J Allergy Clin Immunol</i> 2004;113:1137-43.<br>Liu Z, Kim J, Sypek JP, et al. Gene expression profiles in human nasal polyp tissues studied by means of DNA microarray. <i>J Allergy Clin Immunol</i> 2004;114:783-90.<br>Tewfik MA, Latterich M, DiFalco MR, Samaha M. Proteomics of nasal mucus in chronic rhinosinusitis. <i>Am J Rhinol</i> 2007; 21:680-5.<br>Liu Z, Lu X, Zhang XH, et al. Clara cell 10-kDa protein expression in chronic rhinosinusitis and its cytokine-driven regulation in sinonasal mucosa. <i>Allergy</i> 2009; 64:149-57. |
| SCGB2A2  | secretoglobin, family 2A, member 2                                                    | Fritz SB, Terrell JE, Conner ER, Kukowska-Latallo JF, Baker JR. Nasal mucosal gene expression in patients with allergic rhinitis with and without nasal polyps. <i>J Allergy Clin Immunol</i> 2003;112:1057-63.                                                                                                                                                                                                                                                                                                                                                                                                                                                                                                                        |
| SERPINA1 | Serine peptidase inhibitor a1                                                         | Kilty SJ, Bosse Y, Cormier C, Endam LM, Desrosiers MY. Polymorphisms in the SERPINA1 (Alpha-1-Antitrypsin) gene are associated with severe chronic rhinosinusitis unresponsive to medical therapy. <i>Am J Rhinol Allergy</i> 2010; 24:e4-9.                                                                                                                                                                                                                                                                                                                                                                                                                                                                                           |
| SERPINB4 | serpin peptidase inhibitor, clade B (ovalbumin), member 4                             | Deroee AF, Oweinah J, Naraghi M, et al. Regression of polypoid nasal mucosa after systemic corticosteroid therapy: A proteomics study. <i>Am J Rhinol</i> 2009;23: 480-485                                                                                                                                                                                                                                                                                                                                                                                                                                                                                                                                                             |
| SFTPA1   | surfactant protein A1                                                                 | Woodworth BA, Wood R, Baatz JE, Schlosser RJ. Sinonasal surfactant protein A1, A2, and D gene expression in cystic fibrosis: a preliminary report. <i>Otolaryngol Head Neck Surg</i> 2007; 137:34                                                                                                                                                                                                                                                                                                                                                                                                                                                                                                                                      |
| SFTPD    | surfactant protein D                                                                  |                                                                                                                                                                                                                                                                                                                                                                                                                                                                                                                                                                                                                                                                                                                                        |
| SLPI     | secretory leukocyte peptidase inhibitor                                               | Tewfik MA, Latterich M, DiFalco MR, Samaha M. Proteomics of nasal mucus in chronic rhinosinusitis. <i>Am J Rhinol</i> 2007; 21:680-5.                                                                                                                                                                                                                                                                                                                                                                                                                                                                                                                                                                                                  |
| SPINK5   | serine peptidase inhibitor, Kazal type 5                                              | Richer SL, Truong-Tran AQ, Conley DB, et al. Epithelial genes in chronic rhinosinusitis with and without nasal polyps. <i>Am J Rhinol</i> 2008; 22:228-34.                                                                                                                                                                                                                                                                                                                                                                                                                                                                                                                                                                             |
| ST6GAL1  | ST6 beta-galactosamide alpha-2,6-sialyltransferase 1                                  | Orlandi RR, Thibeault SL, Ferguson BJ. Microarray analysis of allergic fungal sinusitis and eosinophilic mucin rhinosinusitis. <i>Otolaryngol Head Neck Surg</i> 2007;136, 707-713.                                                                                                                                                                                                                                                                                                                                                                                                                                                                                                                                                    |
| TBX21    | T-box 21                                                                              | Van Bruaene N, Perez-Novo CA, Basinski TM, et al. T-cell regulation in chronic paranasal sinus disease. <i>J Allergy Clin Immunol</i> 2008;121:1435-41                                                                                                                                                                                                                                                                                                                                                                                                                                                                                                                                                                                 |
| TCP1     | t-complex 1                                                                           | Deroee AF, Oweinah J, Naraghi M, et al. Regression of polypoid nasal mucosa after systemic corticosteroid therapy: A proteomics study. <i>Am J Rhinol</i> 2009;23: 480-485.                                                                                                                                                                                                                                                                                                                                                                                                                                                                                                                                                            |
| TGFB1    | transforming growth factor, beta 1                                                    | Figueiredo CR, Santos RP, Silva I, Weckx L. Microarray cDNA to identify inflammatory genes in nasal polyposis. <i>Am J Rhinol</i> 2007; 21:231-235.<br>Kim SS, Kim KS, Lee JG, et al. Levels of intracellular protein and messenger RNA of mucin and lysozyme in normal human nasal and polyp epithelium. <i>Laryngoscope</i> 2000; 110:276-80.                                                                                                                                                                                                                                                                                                                                                                                        |

|          |                                                        |                                                                                                                                                                                                                                                                                                                                                                                                                                                                                                                                                          |
|----------|--------------------------------------------------------|----------------------------------------------------------------------------------------------------------------------------------------------------------------------------------------------------------------------------------------------------------------------------------------------------------------------------------------------------------------------------------------------------------------------------------------------------------------------------------------------------------------------------------------------------------|
|          |                                                        | Van Bruaene N, Perez-Novoa CA, Basinski TM, et al. T-cell regulation in chronic paranasal sinus disease. <i>J Allergy Clin Immunol</i> 2008;121:1435-41.                                                                                                                                                                                                                                                                                                                                                                                                 |
| TLR9     | toll-like receptor 9                                   | Ramanathan M, Lee WK, Dubin MG, et al. Sinonasal epithelial cell expression of toll-like receptor 9 is decreased in chronic rhinosinusitis with polyps. <i>Am J Rhinol</i> 2007; 21:110-6.                                                                                                                                                                                                                                                                                                                                                               |
| TNC      | tenascin C                                             | Payne SC, Han JK, Huyett P, et al. Microarray analysis of distinct gene transcription profiles in non-eosinophilic chronic sinusitis with nasal polyps. <i>Am J Rhinol</i> 2008; 22:568–581.                                                                                                                                                                                                                                                                                                                                                             |
| TNF      | tumor necrosis factor                                  | Anand VK, Kacker A, Orjuela AF, et al. Inflammatory pathway gene expression in chronic rhinosinusitis. <i>Am J Rhinol</i> 2006; 20:471-6.<br>Bernstein JM, Anon JB, Rontal M, et al. Genetic polymorphisms in chronic hyperplastic sinusitis with nasal polyposis. <i>Laryngoscope</i> 2009;119:1258-64.<br>Endam LM, Cormier C, Bosse Y, Filali-Mouhim A, Desrosiers M. Association of IL1A, IL1B, and TNF Gene Polymorphisms With Chronic Rhinosinusitis With and Without Nasal Polyposis. <i>Arch Otolaryngol Head Neck Surg</i> 2010;136(2):187-192. |
| TNFRSF1B | tumor necrosis factor receptor superfamily, member 1B  | Rostkowska-Nadolska B, Kapral M, Mazurek U, et al. Quantification of the mRNA encoding Tumor Necrosis Factor alpha (TNFalpha) and its receptors in human nasal polyps. <i>Adv Med Sci</i> 2008; 53:263-9.                                                                                                                                                                                                                                                                                                                                                |
| TNFSF13B | tumor necrosis factor (ligand) superfamily, member 13b | Kato A, Peters A, Suh L, et al. Evidence of a role for B cell-activating factor of the TNF family in the pathogenesis of chronic rhinosinusitis with nasal polyps. <i>J Allergy Clin Immunol</i> 2008;121:1385-92.                                                                                                                                                                                                                                                                                                                                       |
| TP73     | Tumor protein 73                                       | Tournas A, Mfuna L, Bosse Y, et al. A pooling-based genome-wide association study implicates the p73 gene in chronic rhinosinusitis. <i>J Otolaryngol Head Neck Surg</i> 2010;39:188-95.                                                                                                                                                                                                                                                                                                                                                                 |
| TSC22D3  | TSC22 domain family, member 3                          | Zhang XH, Lu X, Long XB, et al. Chronic rhinosinusitis with and without nasal polyps is associated with decreased expression of glucocorticoid-induced leucine zipper. <i>Clin Exp Allergy</i> 2009; 39:647-54.                                                                                                                                                                                                                                                                                                                                          |

**Appendix 2: Genes identified in Ingenuity Pathways Analysis from the highest scoring networks and the central nodal molecules in the top networks.**

| Gene Symbol | Gene Name                                                  |
|-------------|------------------------------------------------------------|
| ADAM8       | ADAM metallopeptidase domaine 8                            |
| ADAMTS      | ADAM metallopeptidase with thrombosponin type 1, motif 9   |
| AKT         | protein kinase AKT                                         |
| AP-1        | Activator protein 1                                        |
| BCL2A1      | BCL-2 related protein A1                                   |
| C/ebp       | Cebp                                                       |
| C3AR1       | complement component 3a receptor 1                         |
| Cbp         | Cebp                                                       |
| CCL11       | chemokine (c-c motif) ligand 11                            |
| CCL24       | chemokine (C-C motif) ligand 24                            |
| CCL25       | chemokine (c-c motif) ligand 25                            |
| CCR2        | chemokine (c-c motif) receptor 2                           |
| CD180       | CD180                                                      |
| Cebp        | Cebp                                                       |
| CGREF1      | cell growth regulator with EF hand domain 1                |
| CHL1        | cell adhesion molecule with homology to L1CAM              |
| CORO1A      | coronin 1A                                                 |
| CREB        | cAMP responsive element binding protein 1                  |
| CRISP3      | cysteine-rich secretory protein 3                          |
| CRLF2       | cytokine receptor-like factor 2                            |
| CST1        | Cystatin SN                                                |
| CST7        | Cystatin F                                                 |
| CTSC        | Cathepsin C                                                |
| DMBT        | deleted in malignant brain tumors                          |
| DMBT1       | deleted in malignant brain tumors 1                        |
| EGFR        | Epithelial growth factor receptor                          |
| ELF5        | E74-like factor 5                                          |
| EMR1        | EGF 1 module containing mucin-like hormone receptor-like 1 |
| Eotaxin     | eotaxin                                                    |
| ERK1/2      | mitogen-activated protein kinase 1/3                       |
| ETS         | ETS1/2                                                     |
| Fcεr1       | Fc epsilon                                                 |
| FCER2       | Fc fragment of IgE                                         |

|              |                                                     |
|--------------|-----------------------------------------------------|
| Fcgr2        | CD32                                                |
| Ferritin     | Ferritin                                            |
| FOXP3        | forkhead box P3                                     |
| G protein    | G protein                                           |
| GM2A         | GM 2 ganglioside activator                          |
| GPR109B      | G-protein coupled receptor 109B                     |
| histone h3   | histone h3                                          |
| HMGA2        | high mobility group AT-group 2                      |
| HRH1         | histamine receptor H1                               |
| IFN-alpha    | interferon alpha                                    |
| IFNG         | interferon gamma                                    |
| IgA          | Immunoglobulin A                                    |
| IgG          | immunoglobulin G                                    |
| IgG1         | Immunoglobulin G1                                   |
| IGKC         | immunoglobulin kappa constant                       |
| IL10         | interleukin 10                                      |
| IL12         | interleukin 12                                      |
| IL16         | Interleukin 16                                      |
| IL23         | Interleukin 23                                      |
| IL6          | Interleukin 6                                       |
| JNK          | mitogen-activated protein kinase 8                  |
| LTB4R        | leukotriene B4 receptor                             |
| Nfkb-RelA    | nuclear factor kappa B                              |
| NOS2         | nitric oxide synthase 2                             |
| P38MAPk      | mitogen-activated protein kinase 14                 |
| Peptidase    | peptidase                                           |
| PI3K         | phosphoinositide-3-kinase                           |
| PKC          | protein kinase c                                    |
| Ptger        | prostaglandin E receptor                            |
| PTGER1       | prostaglandin E receptor 1                          |
| PTGER2       | prostaglandin E receptor 2                          |
| RGS1         | regulator of G-protein signalling 1                 |
| S100A7       | s100 calciumbinding protein A7                      |
| SAMSN1       | SAM domain                                          |
| SCGB1A1      | secretoglobin, family 1A                            |
| SELPLG       | selectin P ligand                                   |
| SERPINF1     | serpin peptidase inhibitor, clade F, member 1       |
| SOCS3        | supressor of cytokine signaling 3                   |
| SSA          | Amyloid A                                           |
| ST6GAL1      | ST6 beta-galactosamide alpha-2,6-sialotransferase 1 |
| ST8S1A1      | ST-8 alpha-n-acetyl neuraminide sialotransferase    |
| TGFB1        | transforming growth factor beta 1                   |
| TH1 Cytokine | cytokine class Th1                                  |
| TNF          | tumor necrosis factor                               |
| TSLP         | thymic stromal lymphopietin                         |
| VEGF         | vascular endothelium growth factor                  |
